# Supplementary material for: Efficient oxidation of hindered amines to nitroxide radicals with hydrogen peroxide over layered double hydroxide
Source: Royal Society of Chemistry journal article supplement (doi:10.1039/d5ra05993c), 2025-01-01
Supplement: d5ra05993c1.pdf [file d5ra05993c1.pdf]

## **Supporting Information**

### **Efficient Oxidation of Hindered Amines to Nitroxide Radicals with Hydrogen Peroxide over Layered Double Hydroxide**

**Yupeng Zhang, Wensheng Xu, Zefan Liu, Ligong Chen, Xilong Yan, Yang Li\*,  
Bowe Wang\***

## Contents

|                                                                                               |    |
|-----------------------------------------------------------------------------------------------|----|
| 1 、 Optimisation of Catalytic Conditions ( Table S1-S4 ) .....                                | 3  |
| 2 、 Hydroxyl radical capture experiment.....                                                  | 6  |
| 3 、 Superoxide radical capture experiment.....                                                | 6  |
| 4 、 Singlet oxygen capture experiment .....                                                   | 6  |
| 5 、 Hydroxyl radical quenching experiment.....                                                | 7  |
| 6 、 Superoxide radical quenching experiment.....                                              | 7  |
| 7 、 Singlet oxygen quenching experiment .....                                                 | 7  |
| 8 、 Preparation of LDH Materials with Various Metal Cations .....                             | 8  |
| 9 、 Preparation of Nitrate-inserted hydrotalcites .....                                       | 12 |
| 10 、 Preparation of hydrotalcites with different magnesium to aluminium ratios .....          | 12 |
| 11 、 Decomposition of H <sub>2</sub> O <sub>2</sub> in the Presence and Absence of LDHs ..... | 13 |
| Fig.S1.....                                                                                   | 14 |
| Fig.S2.....                                                                                   | 15 |
| Fig. S3.....                                                                                  | 16 |
| Fig. S4.....                                                                                  | 17 |
| Fig. S5.....                                                                                  | 18 |
| Fig. S6.....                                                                                  | 18 |
| Fig.S7.....                                                                                   | 19 |
| Fig.S8.....                                                                                   | 19 |
| Fig.S9.....                                                                                   | 20 |
| Table S5 .....                                                                                | 20 |
| Table S6 .....                                                                                | 21 |

## 1、Optimisation of Catalytic Conditions (Table S1-S4)

### Screening of catalysts

The catalytic performance of different LDHs was first evaluated by adding 5.00 wt% of each catalyst relative to the mass of HTEMP under identical conditions for 8.00 hours. The results are summarised in Table 1.

**Table S1** Catalytic performance of different hydrotalcites

| Types of catalysts | Dosage (wt %) | Reaction time (h) | Con. (%) | Sel. (%) |
|--------------------|---------------|-------------------|----------|----------|
| MgAl-LDH           | 5.00          | 8.00              | 99.9     | 99.3     |
| CuAl-LDH           | 5.00          | 8.00              | 1.11     | /        |
| NiAl-LDH           | 5.00          | 8.00              | 53.0     | 96.3     |
| CoAl-LDH           | 5.00          | 8.00              | 1.20     | /        |
| ZnAl-LDH           | 5.00          | 8.00              | 66.5     | 99.7     |
| MgFe-LDH           | 5.00          | 8.00              | 14.6     | 97.7     |
| CuFe-LDH           | 5.00          | 8.00              | 0        | /        |
| NiFe-LDH           | 5.00          | 8.00              | 50.0     | 95.2     |
| CoFe-LDH           | 5.00          | 8.00              | 0.600    | /        |
| ZnFe-LDH           | 5.00          | 8.00              | 50.3     | 98.9     |
| /                  | /             | 8.00              | 0.96     | /        |

Experimental conditions: 5.00 wt% catalyst, 8 equivalents of hydrogen peroxide, 8.00h at 60.0°C

### Screening of reaction temperature

The effect of reaction temperature was investigated by conducting reactions at 40.0 °C, 50.0 °C, and 60.0 °C using 8 equivalents of H<sub>2</sub>O<sub>2</sub> and 5.00 wt% MgAl-LDH catalyst. After 8 hours, no significant change in conversion or selectivity was observed. The results are showed in Table 2.

**Table S2** Effect of reaction temperature

| <b>Types of catalysts</b> | <b>Temperature (°C)</b> | <b>Reaction time (h)</b> | <b>Con. (%)</b> | <b>Sel. (%)</b> |
|---------------------------|-------------------------|--------------------------|-----------------|-----------------|
| MgAl-LDH                  | 40.0                    | 8.00                     | 69.3            | 89.5            |
| MgAl-LDH                  | 50.0                    | 8.00                     | 89.4            | 93.0            |
| MgAl-LDH                  | 60.0                    | 8.00                     | 99.3            | 99.1            |
| MgAl-LDH                  | 70.0                    | 8.00                     | 56.2            | 90.1            |

Optimisation of hydrogen peroxide dosage

Reactions were carried out using varying amounts of H<sub>2</sub>O<sub>2</sub>, at 60.0 °C and 5.00 wt% MgAl-LDH catalyst for 8 h. The results are presented in Table 3.

**Table S3** Effect of H<sub>2</sub>O<sub>2</sub> dosage

| <b>Types of catalysts</b> | <b>H<sub>2</sub>O<sub>2</sub> dosage (eq)</b> | <b>Reaction time (h)</b> | <b>Con. (%)</b> | <b>Sel. (%)</b> |
|---------------------------|-----------------------------------------------|--------------------------|-----------------|-----------------|
| MgAl-LDH                  | 2.00                                          | 8.00                     | 69.5            | 82.1            |
| MgAl-LDH                  | 4.00                                          | 8.00                     | 90.1            | 97.8            |
| MgAl-LDH                  | 6.00                                          | 8.00                     | 94.2            | 98.9            |
| MgAl-LDH                  | 8.00                                          | 8.00                     | 99.3            | 99.1            |
| MgAl-LDH                  | 14.00                                         | 8.00                     | 99.9            | 99.3            |

### Screening of catalyst dosage

An excess of hydrogen peroxide (8 equivalents relative to HTEMP) was used, and the reaction temperature was maintained at 60.0 °C. MgAl-LDH was employed as the catalyst with catalyst dosage from 0.500% to 5.00% shown in table 4. The reaction was monitored by GC, the results are summarised in Table 4.

**Table S4** Effect of catalyst dosage

| <b>Types of catalysts</b> | <b>Dosage (wt %)</b> | <b>Reaction time (h)</b> | <b>Con. (%)</b> | <b>Sel. (%)</b> |
|---------------------------|----------------------|--------------------------|-----------------|-----------------|
| MgAl-LDH                  | 0.500                | 8.00                     | 13.2            | 92.4            |
| MgAl-LDH                  | 1.00                 | 8.00                     | 55.9            | 96.3            |
| MgAl-LDH                  | 1.50                 | 8.00                     | 62.9            | 96.4            |
| MgAl-LDH                  | 2.00                 | 8.00                     | 85.8            | 96.8            |
| MgAl-LDH                  | 2.50                 | 8.00                     | 88.0            | 95.1            |
| MgAl-LDH                  | 3.00                 | 8.00                     | 93.7            | 96.8            |
| MgAl-LDH                  | 3.50                 | 8.00                     | 95.4            | 97.5            |
| MgAl-LDH                  | 4.00                 | 8.00                     | 96.9            | 98.8            |
| MgAl-LDH                  | 4.50                 | 8.00                     | 99.7            | 98.4            |
| MgAl-LDH                  | 5.00                 | 8.00                     | 99.8            | 99.30           |

## **2 、 Hydroxyl radical capture experiment**

Coumarin-3-carboxylic acid of 20.0 mg, MgAl-LDH of 30.0 mg and 15.0 ml of water were added to a 50 mL round-bottomed flask and stirred thoroughly. Subsequently, 6.78 mL 30.0% H<sub>2</sub>O<sub>2</sub> was added dropwise to the reaction mixture and stirred at preset temperature for 30.0 min, and the fluorescence emission spectra of the reaction mixture were collected.

## **3 、 Superoxide radical capture experiment**

NBT of 20.0 mg, MgAl-LDH of 30.0 mg and 15.0 ml of methanol were added to a 50 mL round-bottomed flask and stirred thoroughly. Subsequently, 6.78 mL 30% H<sub>2</sub>O<sub>2</sub> was added dropwise to the reaction mixture and stirred at preset temperature for 120 min, and the UV-Vis absorption spectra of the reaction mixture were collected.

## **4 、 Singlet oxygen capture experiment**

DPBF of 20.0 mg, MgAl-LDH of 30.0 mg and 15.0 ml of methanol were added to a 50 mL round-bottomed flask and stirred thoroughly. Subsequently, 6.78 mL 30% H<sub>2</sub>O<sub>2</sub> was added dropwise to the reaction mixture and stirred at preset temperature for 60.0 min, and the UV-Vis absorption spectra of the reaction mixture were collected.

## **5 、 Hydroxyl radical quenching experiment**

HTEMP (1.57 g, 0.0100 mol), 78.5 mg of MgAl-LDH, and 15.0 mL of methanol were added to a 50 mL round-bottom flask. Subsequently, 30.0% aqueous hydrogen peroxide containing 0.0800 mol H<sub>2</sub>O<sub>2</sub> was added, and the reaction mixture was stirred at 60.0 °C for 8.00 hours. The conversion and selectivity were determined by GC and

compared with those obtained under identical conditions using water as the solvent.

## **6 · Superoxide radical quenching experiment**

HTEMP (1.57 g, 0.0100 mol), p-BQ (20.0 mg, 0.185mmol), 78.5 mg of MgAl-LDH, and 15.0 mL of deionised water were added to a 50 mL round-bottom flask. Subsequently, 30% aqueous hydrogen peroxide containing 0.0800 mol  $\text{H}_2\text{O}_2$  was added, and the reaction mixture was stirred at 60.0 °C for 8.00 hours. The conversion and selectivity were determined by GC and compared with those obtained under identical aqueous conditions without the addition of p-BQ

## **7 · Singlet oxygen quenching experiment**

HTEMP (1.57 g, 0.0100 mol),  $\beta$ -carotene (199 mg, 0.370mmol), 78.5 mg of MgAl-LDH, and 15.0 mL of deionised water were added to a 50 mL round-bottom flask. Subsequently, 30% aqueous hydrogen peroxide containing 0.0800 mol  $\text{H}_2\text{O}_2$  was added, and the reaction mixture was stirred at 60.0 °C for 8.00 hours. The conversion and selectivity were determined by GC and compared with those obtained under identical aqueous conditions without the addition of  $\beta$ -carotene.

## **8 · Preparation of LDH Materials with Various Metal Cations**

ZnAl-LDH :  $\text{Zn}(\text{NO}_3)_2 \cdot 6\text{H}_2\text{O}$  (4.46 g, 15.0 mmol) and  $\text{Al}(\text{NO}_3)_3 \cdot 9\text{H}_2\text{O}$  (1.88 g, 5.00 mmol) were dissolved in 25.0 mL water to afford solution A. NaOH (3.60 g, 90.0 mmol) and  $\text{Na}_2\text{CO}_3$  (1.06 g, 10.0 mmol) were dissolved in 25.0 mL water to yield solution B. Solutions A and B were simultaneously added dropwise to a four-necked round-bottom flask containing 25.0 mL of water at 25.0 °C under stirring. During the

co-precipitation process, the pH of the reaction mixture was maintained between 11 and 12 by the addition rate of solution B. The resulting slurry was aged at 80.0 °C for 8.00 hours. The precipitate was collected by filtration, thoroughly washed with water, and dried at 80.0 °C for 24.0 hours to afford the ZnAl-LDH with a molar ratio of 3:1.

CuAl-LDH :  $\text{Cu}(\text{NO}_3)_2 \cdot 3\text{H}_2\text{O}$  (3.63 g, 15.0 mmol) and  $\text{Al}(\text{NO}_3)_3 \cdot 9\text{H}_2\text{O}$  (1.88 g, 5.00 mmol) were dissolved in 25.0 mL water to afford solution A. NaOH (3.60 g, 90.0 mmol) and  $\text{Na}_2\text{CO}_3$  (1.06 g, 10.0 mmol) were dissolved in 25.0 mL water to yield solution B. Solutions A and B were simultaneously added dropwise to a four-necked round-bottom flask containing 25.0 mL of water at 25.0 °C under stirring. During the co-precipitation process, the pH of the reaction mixture was maintained between 6 and 7 by the addition rate of solution B. The resulting slurry was aged at 70.0 °C for 8.00 hours. The precipitate was collected by filtration, thoroughly washed with water, and dried at 70.0 °C for 24.0 hours to afford the CuAl-LDH with a molar ratio of 3:1.

NiAl-LDH :  $\text{Ni}(\text{NO}_3)_2 \cdot 6\text{H}_2\text{O}$  (4.36 g, 15.0 mmol) and  $\text{Al}(\text{NO}_3)_3 \cdot 9\text{H}_2\text{O}$  (1.88 g, 5.00 mmol) were dissolved in 25.0 mL water to afford solution A. NaOH (3.60 g, 90.0 mmol) and  $\text{Na}_2\text{CO}_3$  (1.06 g, 10.0 mmol) were dissolved in 25.0 mL water to yield solution B. Solutions A and B were simultaneously added dropwise to a four-necked round-bottom flask containing 25.0 mL of water at 25.0 °C under stirring. During the co-precipitation process, the pH of the reaction mixture was maintained between 11 and 12 by the addition rate of solution B. The resulting slurry was aged at 80.0 °C for 8.00 hours. The precipitate was collected by filtration, thoroughly washed with water, and dried at 80.0 °C for 24.0 hours to afford the NiAl-LDH with a molar ratio of 3:1.



CoAl-LDH :  $\text{Co}(\text{NO}_3)_2 \cdot 6\text{H}_2\text{O}$  (4.37 g, 15.0 mmol) and  $\text{Al}(\text{NO}_3)_3 \cdot 9\text{H}_2\text{O}$  (1.88 g, 5.00 mmol) were dissolved in 25.0 mL water to afford solution A. NaOH (3.60 g, 90.0 mmol) and  $\text{Na}_2\text{CO}_3$  (1.06 g, 10.0 mmol) were dissolved in 25.0 mL water to yield solution B. Solutions A and B were simultaneously added dropwise to a four-necked round-bottom flask containing 25.0 mL of water at 25.0 °C under stirring. During the co-precipitation process, the pH of the reaction mixture was maintained between 11 and 12 by the addition rate of solution B. The resulting mixed solution was aged in a hydrothermal autoclave at 120 °C for 8.00 h. The precipitate was collected by filtration, thoroughly washed with water, and dried at 80.0 °C for 24.0 hours to afford the CoAl-LDH with a molar ratio of 3:1.

MgFe-LDH :  $\text{Mg}(\text{NO}_3)_2 \cdot 6\text{H}_2\text{O}$  (3.85 g, 15.0 mmol) and  $\text{Fe}(\text{NO}_3)_3 \cdot 9\text{H}_2\text{O}$  (2.02 g, 5.00 mmol) were dissolved in 25.0 mL water to afford solution A. NaOH (3.60 g, 90.0 mmol) and  $\text{Na}_2\text{CO}_3$  (1.06 g, 10.0 mmol) were dissolved in 25.0 mL water to yield solution B. Solutions A and B were simultaneously added dropwise to a four-necked round-bottom flask containing 25.0 mL of water at 25.0 °C under stirring. During the co-precipitation process, the pH of the reaction mixture was maintained between 11 and 12 by the addition rate of solution B. The resulting mixed solution was aged in a hydrothermal autoclave at 120 °C for 8.00 h. The precipitate was collected by filtration, thoroughly washed with water, and dried at 80.0 °C for 24.0 hours to afford the MgFe-LDH with a molar ratio of 3:1.

CuFe-LDH :  $\text{Cu}(\text{NO}_3)_2 \cdot 3\text{H}_2\text{O}$  (3.63 g, 15.0 mmol) and  $\text{Fe}(\text{NO}_3)_3 \cdot 9\text{H}_2\text{O}$  (2.02 g, 5.00 mmol) were dissolved in 25.0 mL water to afford solution A. NaOH (3.60 g, 90.0

mmol) and  $\text{Na}_2\text{CO}_3$  (1.06 g, 10.0 mmol) were dissolved in 25.0 mL water to yield solution B. Solutions A and B were simultaneously added dropwise to a four-necked round-bottom flask containing 25.0 mL of water at 25.0 °C under stirring. During the co-precipitation process, the pH of the reaction mixture was maintained between 6 and 7 by the addition rate of solution B. The resulting slurry was aged at 70.0 °C for 7.00 hours. The precipitate was collected by filtration, thoroughly washed with water, and dried at 70.0 °C for 24.0 hours to afford the CuFe-LDH with a molar ratio of 3:1.

ZnFe-LDH :  $\text{Zn}(\text{NO}_3)_2 \cdot 6\text{H}_2\text{O}$  (4.46 g, 15.0 mmol) and  $\text{Fe}(\text{NO}_3)_3 \cdot 9\text{H}_2\text{O}$  (2.02 g, 5.00 mmol) were dissolved in 25.0 mL water to afford solution A. NaOH (3.60 g, 90.0 mmol) and  $\text{Na}_2\text{CO}_3$  (1.06 g, 10.0 mmol) were dissolved in 25.0 mL water to yield solution B. Solutions A and B were simultaneously added dropwise to a four-necked round-bottom flask containing 25.0 mL of water at 25.0 °C under stirring. During the co-precipitation process, the pH of the reaction mixture was maintained between 11 and 12 by the addition rate of solution B. The resulting mixed solution was aged in a hydrothermal autoclave at 120 °C for 8.00 h. The precipitate was collected by filtration, thoroughly washed with water, and dried at 80.0 °C for 24.0 hours to afford the ZnFe-LDH with a molar ratio of 3:1.

NiFe-LDH :  $\text{Ni}(\text{NO}_3)_2 \cdot 6\text{H}_2\text{O}$  (4.36 g, 15.0 mmol) and  $\text{Fe}(\text{NO}_3)_3 \cdot 9\text{H}_2\text{O}$  (2.02 g, 5.00 mmol) were dissolved in 25.0 mL water to afford solution A. NaOH (3.60 g, 90.0 mmol) and  $\text{Na}_2\text{CO}_3$  (1.06 g, 10.0 mmol) were dissolved in 25.0 mL water to yield solution B. Solutions A and B were simultaneously added dropwise to a four-necked round-bottom flask containing 25.0 mL of water at 25.0 °C under stirring. During the

co-precipitation process, the pH of the reaction mixture was maintained between 11 and 12 by the addition rate of solution B. The resulting slurry was aged at 80.0 °C for 8.00 hours. The precipitate was collected by filtration, thoroughly washed with water, and dried at 80.0 °C for 24.0 hours to afford the NiFe-LDH with a molar ratio of 3:1.

CoFe-LDH :  $\text{Co}(\text{NO}_3)_2 \cdot 6\text{H}_2\text{O}$  (4.37 g, 15.0 mmol) and  $\text{Fe}(\text{NO}_3)_3 \cdot 9\text{H}_2\text{O}$  (2.02 g, 5.00 mmol) were dissolved in 25.0 mL water to afford solution A. NaOH (3.60 g, 90.0 mmol) and  $\text{Na}_2\text{CO}_3$  (1.06 g, 10.0 mmol) were dissolved in 25.0 mL water to yield solution B. Solutions A and B were simultaneously added dropwise to a four-necked round-bottom flask containing 25.0 mL of water at 25.0 °C under stirring. During the co-precipitation process, the pH of the reaction mixture was maintained between 11 and 12 by the addition rate of solution B. The resulting mixed solution was aged in a hydrothermal autoclave at 120 °C for 8.00 h. The precipitate was collected by filtration, thoroughly washed with water, and dried at 80.0 °C for 24.0 hours to afford the CoFe-LDH with a molar ratio of 3:1.

## 9 、 Preparation of Nitrate-inserted hydrotalcites

$\text{Mg}(\text{NO}_3)_2 \cdot 6\text{H}_2\text{O}$  (3.85 g, 15.0 mmol) and  $\text{Al}(\text{NO}_3)_3 \cdot 9\text{H}_2\text{O}$  (1.88 g, 5.00 mmol) were dissolved in 25.0 mL water to afford solution A. NaOH (3.60 g, 90.0 mmol) were dissolved in 25.0 mL water to yield solution B. Solutions A and B were simultaneously added dropwise to a four-necked round-bottom flask containing 25.0 mL of water at 25.0 °C under stirring. During the co-precipitation process, the pH of the reaction mixture was maintained between 11 and 12 by the addition rate of solution B. The resulting slurry was aged at 80.0 °C for 8.00 hours. The solid product was separated by

filtration, washed thoroughly with deionised water (to remove the base from the catalyst) and then dried at 80.0°C for 24.0 hours.

#### **10 、 Preparation of hydrotalcites with different magnesium to aluminium ratios**

Mg1Al preparation:  $\text{Mg}(\text{NO}_3)_2 \cdot 6\text{H}_2\text{O}$  (3.85 g, 15.0 mmol) and  $\text{Al}(\text{NO}_3)_3 \cdot 9\text{H}_2\text{O}$  (5.63 g, 15.0 mmol) were dissolved in 25.0 mL water to afford solution A. NaOH (3.60 g, 90.0 mmol) and  $\text{Na}_2\text{CO}_3$  (1.06 g, 10.0 mmol) were dissolved in 25.0 mL water to yield solution B. Solutions A and B were simultaneously added dropwise to a four-necked round-bottom flask containing 25.0 mL of water at 25.0 °C under stirring. During the co-precipitation process, the pH of the reaction mixture was maintained between 11 and 12 by the addition rate of solution B. The resulting slurry was aged at 80.0 °C for 8.00 hours. The solid product was separated by filtration, washed thoroughly with deionised water (to remove the base from the catalyst) and then dried at 80.0°C for 24.0 hours.

Mg4Al preparation:  $\text{Mg}(\text{NO}_3)_2 \cdot 6\text{H}_2\text{O}$  (5.128 g, 20.0 mmol) and  $\text{Al}(\text{NO}_3)_3 \cdot 9\text{H}_2\text{O}$  (1.88 g, 5.00 mmol) were dissolved in 25.0 mL water to afford solution A. NaOH (3.60 g, 90.0 mmol) and  $\text{Na}_2\text{CO}_3$  (1.06 g, 10.0 mmol) were dissolved in 25.0 mL water to yield solution B. Solutions A and B were simultaneously added dropwise to a four-necked round-bottom flask containing 25.0 mL of water at 25.0 °C under stirring. During the co-precipitation process, the pH of the reaction mixture was maintained between 11 and 12 by the addition rate of solution B. The resulting slurry was aged at 80.0 °C for 8.00 hours. The solid product was separated by filtration, washed thoroughly with deionised water (to remove the base from the catalyst) and then dried

at 80.0°C for 24.0 hours.

## 11 · Decomposition of H<sub>2</sub>O<sub>2</sub> in the Presence and Absence of LDHs

A 30% aqueous solution of hydrogen peroxide (1 mL, 9.00 mmol) was dissolved in 10.0 mL of water. The experiments were conducted under two conditions: with the addition of 10 mg MgAl-LDH and without LDHs. The reaction vessel was sealed and heated to 60 °C. The gas outlet was connected to an inverted graduated cylinder submerged in water, and the volume of O<sub>2</sub> generated was recorded over time using the water-displacement method.

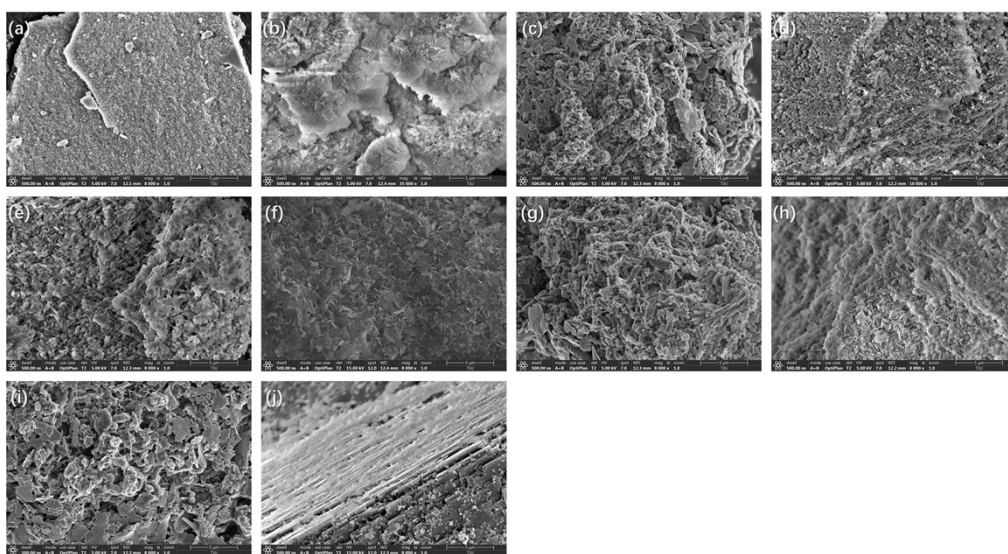

**Fig.S1** (a) SEM image of MgAl-LDH (b) SEM image of NiAl-LDH (c) SEM image of CuAl-LDH (d) SEM image of ZnAl-LDH (e) SEM image of CoAl-LDH (f) SEM image of MgFe-LDH (g) SEM image of CuFe-LDH (h) SEM image of NiFe-LDH (i) SEM image of CoFe-LDH (j) SEM image of ZnFe-LDH

(a)

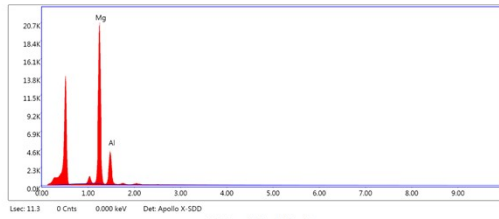

| eZAF Smart Quant Results |          |          |          |         |        |        |        |
|--------------------------|----------|----------|----------|---------|--------|--------|--------|
| Element                  | Weight % | Atomic % | Net Int. | Error % | Kratio | Z      | A      |
| MgK                      | 73.19    | 75.19    | 25567.20 | 1.67    | 0.6981 | 0.9353 | 1.0173 |
| AlK                      | 26.81    | 24.81    | 5615.20  | 5.40    | 0.1593 | 0.9017 | 0.6589 |

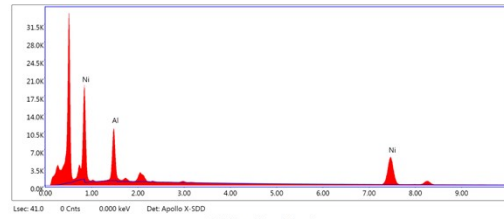

| eZAF Smart Quant Results |          |          |          |         |        |        |        |
|--------------------------|----------|----------|----------|---------|--------|--------|--------|
| Element                  | Weight % | Atomic % | Net Int. | Error % | Kratio | Z      | A      |
| AlK                      | 13.81    | 25.86    | 4150.70  | 5.53    | 0.0945 | 0.9944 | 0.6143 |
| NiK                      | 86.19    | 74.14    | 4058.70  | 3.02    | 0.7949 | 0.9188 | 1.0021 |

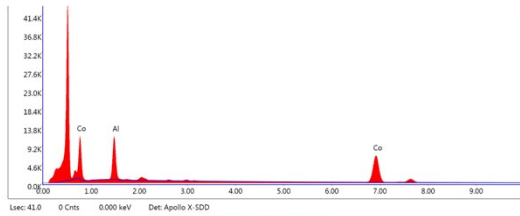

| eZAF Smart Quant Results |          |          |          |         |        |        |        |
|--------------------------|----------|----------|----------|---------|--------|--------|--------|
| Element                  | Weight % | Atomic % | Net Int. | Error % | Kratio | Z      | A      |
| AlK                      | 13.33    | 25.15    | 4195.70  | 5.23    | 0.0880 | 1.0270 | 0.6417 |
| CoK                      | 86.67    | 74.85    | 4851.10  | 2.74    | 0.7913 | 0.9097 | 1.0020 |

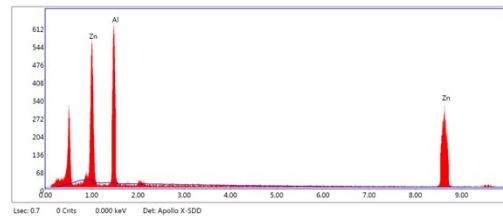

| eZAF Smart Quant Results |          |          |          |         |        |        |        |
|--------------------------|----------|----------|----------|---------|--------|--------|--------|
| Element                  | Weight % | Atomic % | Net Int. | Error % | Kratio | Z      | A      |
| AlK                      | 9.29     | 19.88    | 12195.20 | 7.31    | 0.0532 | 1.0370 | 0.5517 |
| ZnK                      | 90.71    | 80.12    | 11587.90 | 5.29    | 0.6480 | 0.9318 | 1.0018 |

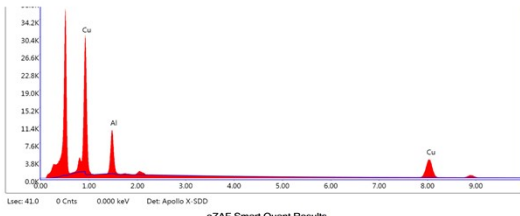

| eZAF Smart Quant Results |          |          |          |         |        |        |        |
|--------------------------|----------|----------|----------|---------|--------|--------|--------|
| Element                  | Weight % | Atomic % | Net Int. | Error % | Kratio | Z      | A      |
| AlK                      | 12.60    | 25.34    | 3737.60  | 6.05    | 0.0786 | 1.0353 | 0.5869 |
| CuK                      | 87.40    | 74.66    | 3158.10  | 3.42    | 0.8057 | 0.9187 | 1.0016 |

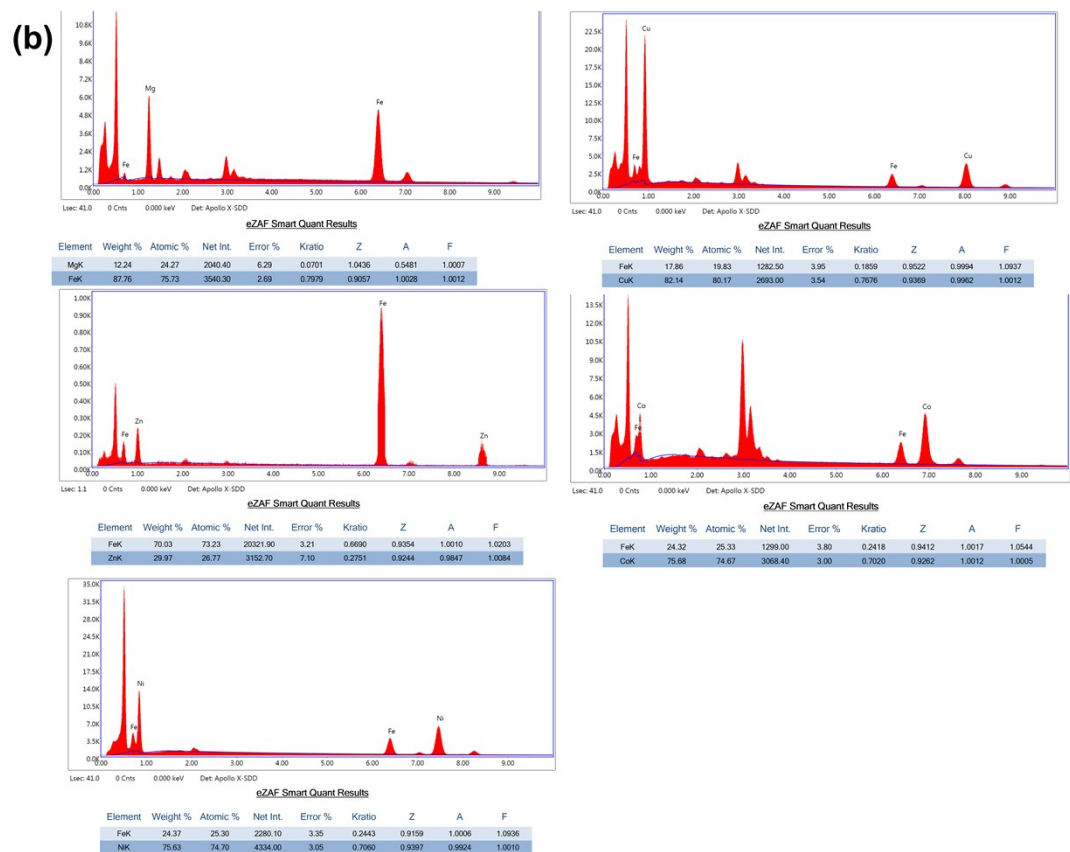

**Fig.S2 (a)** EDS Spectrum of Fe-Based LDH. The molar ratio of divalent cations to trivalent iron ions was 3:1. **(b)** EDS Spectrum of Al-Based LDH The molar ratio of divalent cations to trivalent aluminium ions was 3:1.

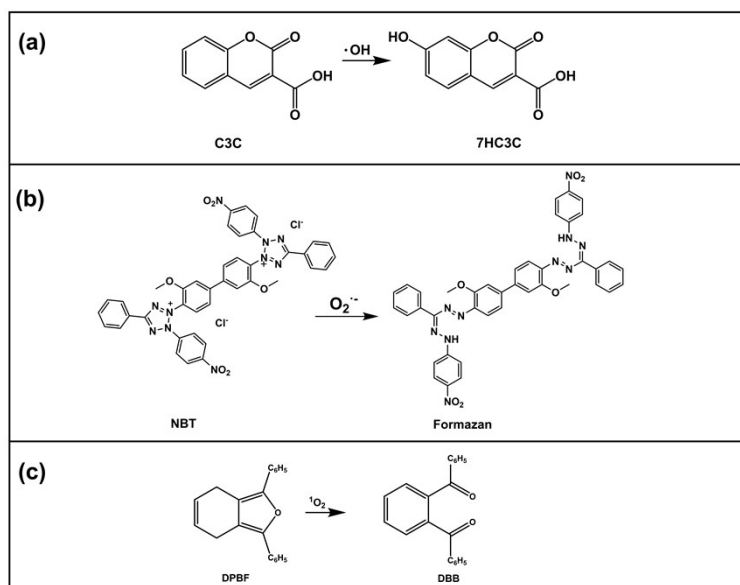

**Fig. S3** (a) Reaction equation for C3C capturing hydroxyl radicals (b) Reaction equation for NBT capturing superoxide anions (c) Reaction equation for DPBF capturing singlet oxygen



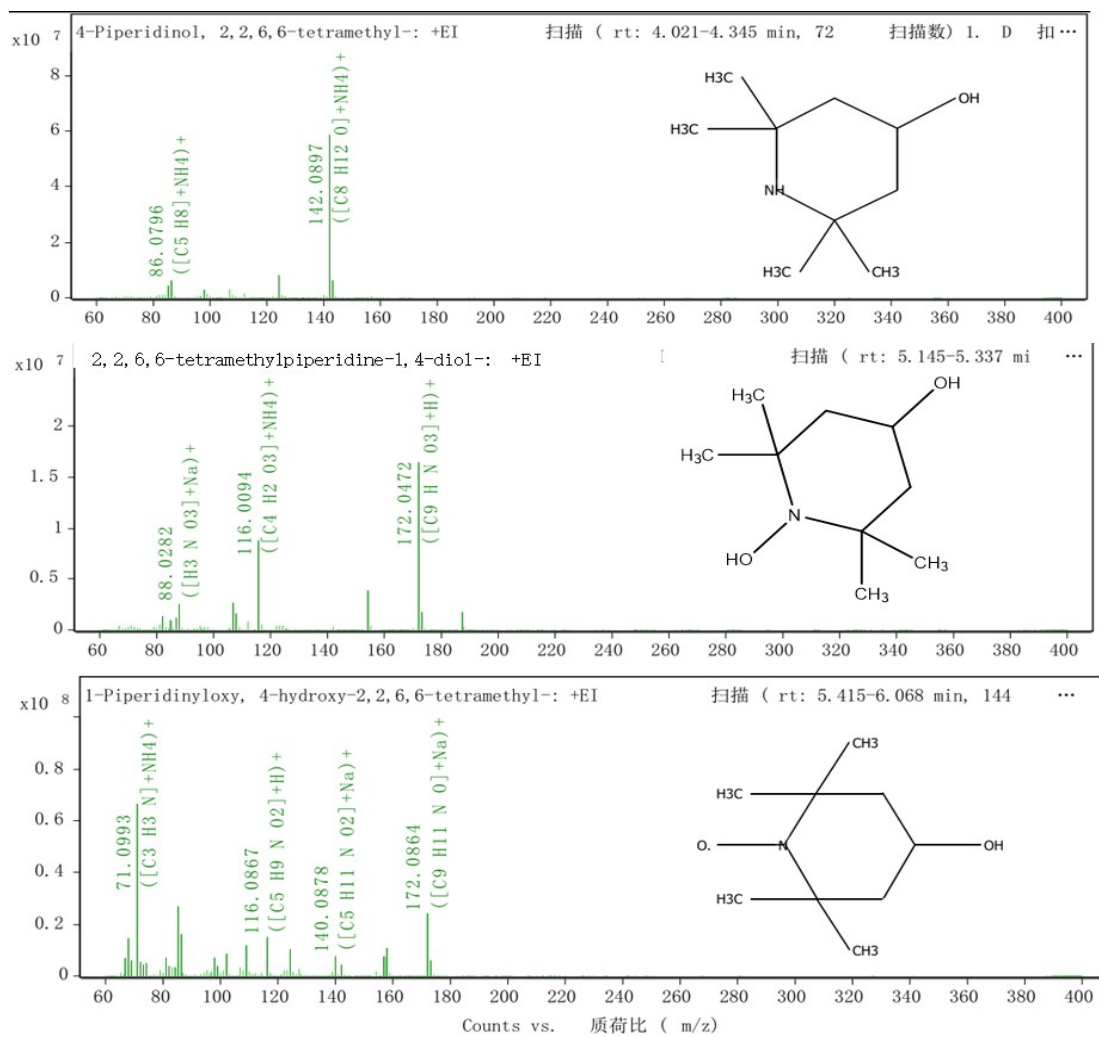

**Fig. S4** GC-MS test plot of reaction mixture

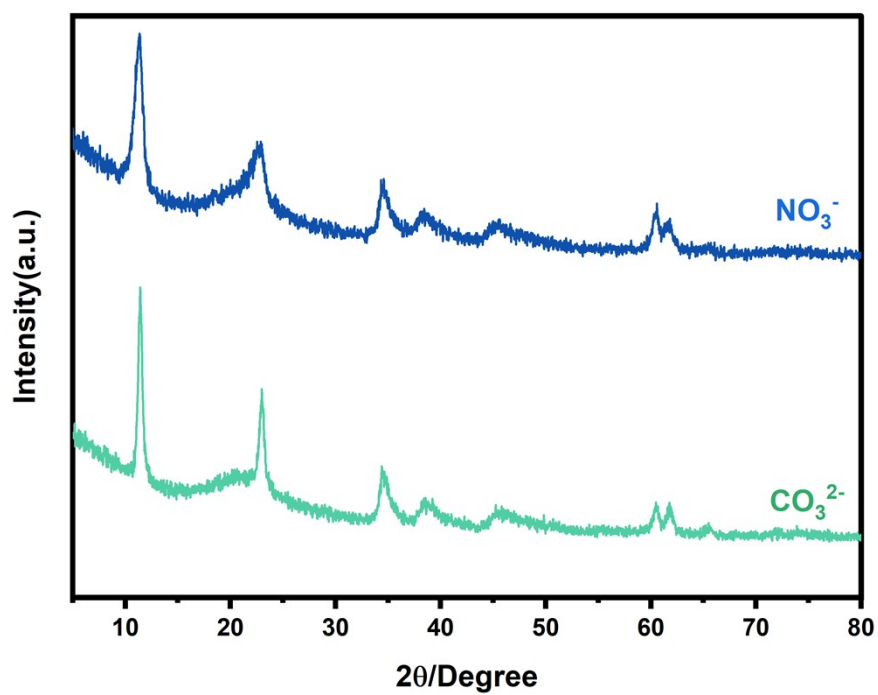

Fig. S5 XRD pattern of nitrate intercalated hydrotalcite

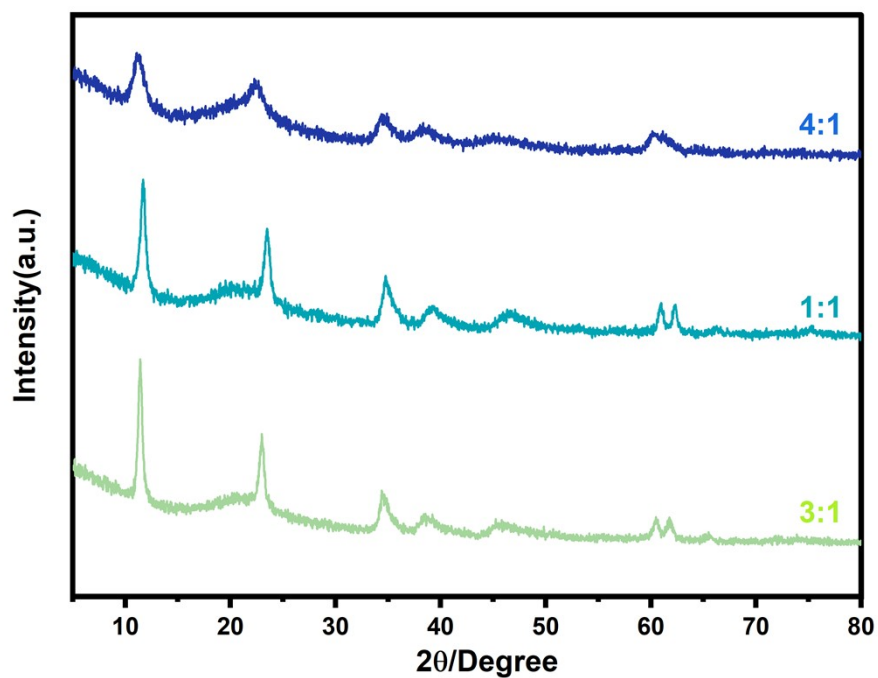

Fig. S6 XRD pattern of hydrotalcites with different Mg-Al ratios

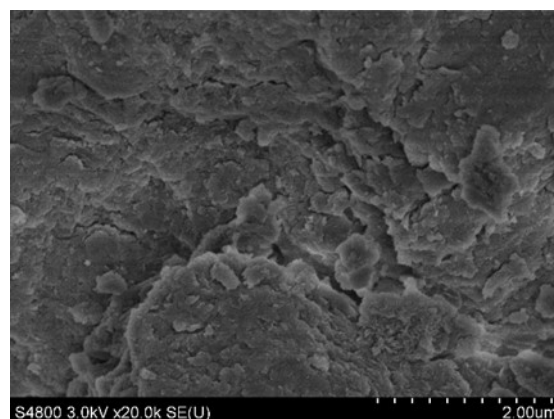

**Fig.S7** SEM image of Mg<sub>4</sub>Al-LDH

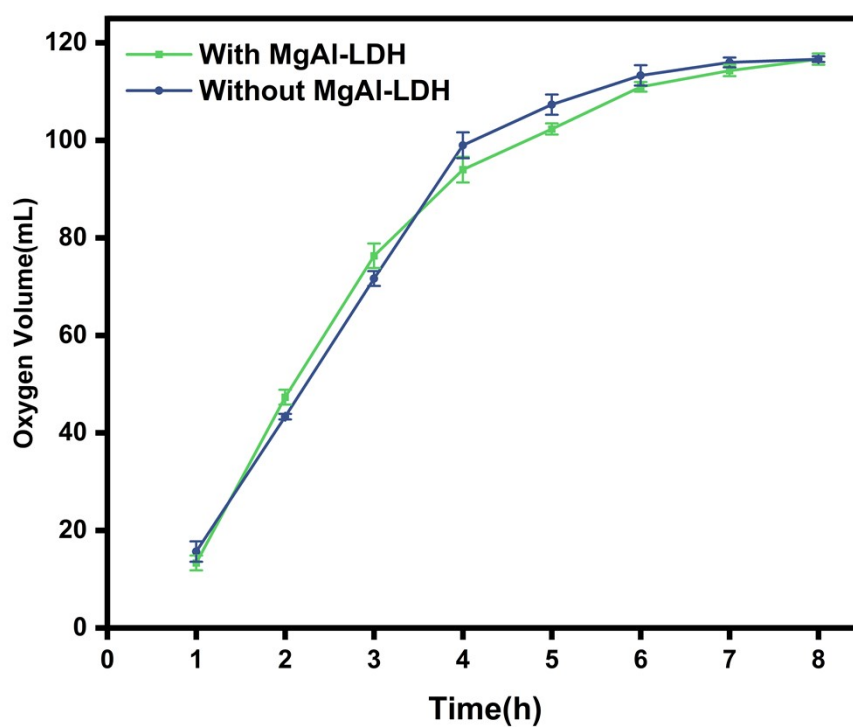

**Fig.S8** Time-dependent O<sub>2</sub> evolution from H<sub>2</sub>O<sub>2</sub> decomposition with and without MgAl-LDHs, showing nearly identical decomposition rates under the experimental conditions.

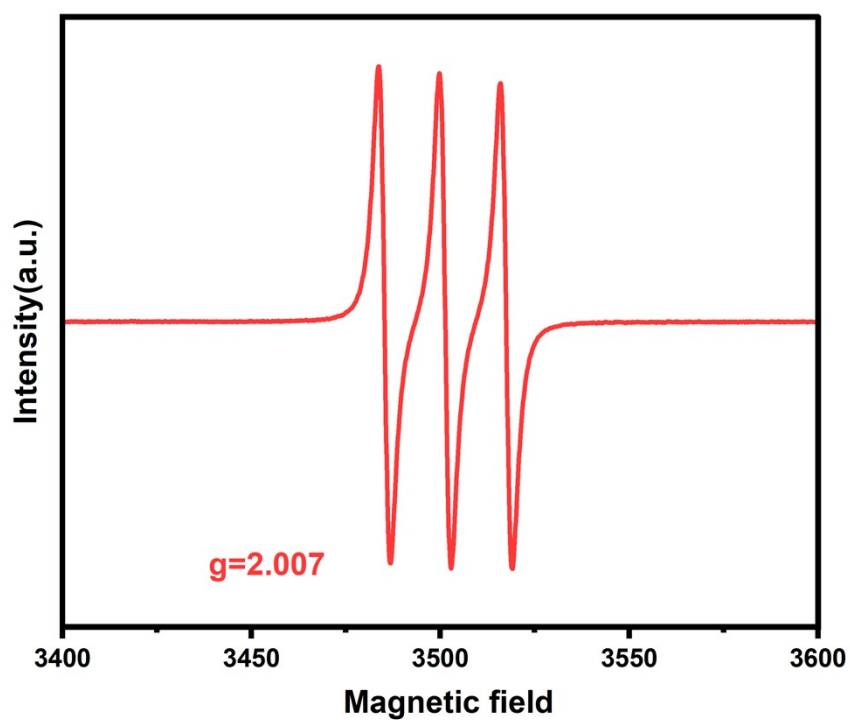

**Fig.S9** EPR spectrum of HTEMPO

**Table S5** DFT-Calculated Gibbs Free Energies for Different Reaction Pathways

|                                                                    | Delta G (a.u.) | Delta G (kcal/mol) |
|--------------------------------------------------------------------|----------------|--------------------|
| $\text{int1} + \cdot\text{OH} = \text{int2} + \text{OH}^-$         | 0.239076       | 150.02             |
| $\text{int2} + \text{O}_2\cdot^- = \text{int3} + \text{HO}_2\cdot$ | -0.203888      | -127.94            |
| $\text{int2} + \text{OH}^- = \text{int3} + \text{H}_2\text{O}$     | -0.274507      | -172.26            |
| $\text{int3} + {}^1\text{O}_2 = \text{int4}$                       | -0.048445      | -30.40             |
| $\text{int4} + \text{int3} = 2 \text{ int5}$                       | -0.106947      | -67.11             |
| $\text{int3} + \cdot\text{OH} = \text{int6}$                       | -0.081798      | -51.33             |
| $\text{int6} + \text{O}_2\cdot^- = \text{int5} + \text{HO}_2^-$    | 0.010707       | 6.72               |

**Table S6** Catalytic Performance of LDHs with Different Mg/Al Ratios

| <b>Types of catalysts</b> | <b>Dosage (wt%)</b> | <b>Con. (%)</b> | <b>Sel. (%)</b> |
|---------------------------|---------------------|-----------------|-----------------|
| Mg3Al                     | 5.00                | 99.9            | 99.3            |
| Mg4Al                     | 5.00                | 99.3            | 98.5            |
| Mg1Al                     | 5.00                | 79.6            | 99.2            |
| Mg4Al                     | 2.50                | 99.9            | 97.2            |
